# Supplementary material for: Evaluation of Strategies for Reducing Vancomycin-Piperacillin/Tazobactam Incompatibility
Source: MDPI journal article supplement (doi:10.3390/pharmaceutics15082069), 2023-08-01
Supplement: s1 [file s1]

## Supplementary methods

| Products                     | Manufacturer | Initial concentration / Dose | Batch numbers    | Expiration dates   |
|------------------------------|--------------|------------------------------|------------------|--------------------|
| Vancomycin                   | Mylan        | 1 g                          | C0312            | 2023-10            |
|                              |              |                              | C0274            | 2023-09            |
|                              |              |                              | C0323            | 2023-09            |
| Piperacillin/tazobactam (PT) | Panpharma    | 4 g/500 mg                   | 307484<br>306723 | 2025-02<br>2023-12 |
| Saline solution (SS)         | Baxter       | 0.9%                         | 22B25T1G         | 2024-01            |
|                              |              |                              | 22D18T1B         | 2024-01            |
|                              |              |                              | 21L01T1D         | 2023-11            |

**Table S1:** The infused drugs and diluents used in the *in vitro* study

| Medical devices                                    | Manufacturer                             | References             | Batch numbers        | Expiration dates      |
|----------------------------------------------------|------------------------------------------|------------------------|----------------------|-----------------------|
| Needles 1.2 mm x 40 mm                             | Becton Dickinson, Fraga, Spain           | K111815<br>304622      | 80108010<br>1805 15  | 2026-08-11<br>2023-04 |
| Syringe 20 mL Luer-lock<br>BD Plastipak            | BD Switzerland Sàrl, Eysins, Switzerland | 300629                 | 2102012              | 2026-01-31            |
| Syringe 50 mL Luer-lock<br>BD Plastipak            | BD Switzerland Sàrl, Eysins, Switzerland | 300865                 | 2204025              | 2027-03-31            |
| Three-port manifold + 150 cm PE/PVC extension line | CAIR LGL, Lissieu, France                | RPB3315                | 22A24-TJB            | 2026-12-24            |
| PE/PVC extension line                              | CAIR LGL, Lissieu, France                | PB3115                 | 22C28-TNPW           | 2027-02-28            |
| Four-port manifold + 200 cm PE/PVC extension line  | CAIR LGL, Lissieu, France                | RPB4320                | 22C23-TWNP           | 2027-02-23            |
| Infusion pump set                                  | Fresenius Kabi AG, Bad Homburg, Germany  | M46441000S<br>Z072810F | 84461131<br>84171129 | 2024-11-14<br>2022-04 |
| Syringe pump                                       | Fresenius Vial, Brezins, France          | 083010                 |                      |                       |
| Infusion pump                                      | Fresenius Vial, Brezins, France          | Volumat MC agilia F    | EP5113-0             |                       |

**Table S2:** The medical devices used for preparation and infusion in the present *in vitro* study
